# Hard-Object Feeding in Sooty Mangabeys (*Cercocebus atys*) and Interpretation of Early Hominin Feeding Ecology

David J. Daegling<sup>1\*</sup>, W. Scott McGraw<sup>2</sup>, Peter S. Ungar<sup>3</sup>, James D. Pampush<sup>1</sup>, Anna E. Vick<sup>4</sup>, E. Anderson Bitty<sup>5</sup>

**1** Department of Anthropology, University of Florida, Gainesville, Florida, United States of America, **2** Department of Anthropology, The Ohio State University, Columbus, Ohio, United States of America, **3** Department of Anthropology, University of Arkansas, Fayetteville, Arkansas, United States of America, **4** Department of Social and Behavioral Sciences, Santa Fe College, Gainesville, Florida, United States of America, **5** Laboratoire de Zoologie, Université d'Abidjan-Cocody, Abidjan, Côte d'Ivoire

## Abstract

Morphology of the dentofacial complex of early hominins has figured prominently in the inference of their dietary adaptations. Recent theoretical analysis of craniofacial morphology of *Australopithecus africanus* proposes that skull form in this taxon represents adaptation to feeding on large, hard objects. A modern analog for this specific dietary specialization is provided by the West African sooty mangabey, *Cercocebus atys*. This species habitually feeds on the large, exceptionally hard nuts of *Sacoglottis gabonensis*, stereotypically crushing the seed casings using their premolars and molars. This type of behavior has been inferred for *A. africanus* based on mathematical stress analysis and aspects of dental wear and morphology. While postcanine megadontia, premolar enlargement and thick molar enamel characterize both *A. africanus* and *C. atys*, these features are not universally associated with durophagy among living anthropoids. Occlusal microwear analysis reveals complex microwear textures in *C. atys* unlike those observed in *A. africanus*, but more closely resembling textures observed in *Paranthropus robustus*. Since sooty mangabeys process hard objects in a manner similar to that proposed for *A. africanus*, yet do so without the craniofacial buttressing characteristic of this hominin, it follows that derived features of the australopith skull are sufficient but not necessary for the consumption of large, hard objects. The adaptive significance of australopith craniofacial morphology may instead be related to the toughness, rather than the hardness, of ingested foods.

**Citation:** Daegling DJ, McGraw WS, Ungar PS, Pampush JD, Vick AE, et al. (2011) Hard-Object Feeding in Sooty Mangabeys (*Cercocebus atys*) and Interpretation of Early Hominin Feeding Ecology. PLoS ONE 6(8): e23095. doi:10.1371/journal.pone.0023095

**Editor:** Fred H. Smith, Illinois State University, United States of America

**Received:** March 2, 2011; **Accepted:** July 7, 2011; **Published:** August 26, 2011

**Copyright:** © 2011 Daegling et al. This is an open-access article distributed under the terms of the Creative Commons Attribution License, which permits unrestricted use, distribution, and reproduction in any medium, provided the original author and source are credited.

**Funding:** Supported by NSF BCS 0840110, 0921770, 0922429, 0315157. The funders had no role in study design, data collection and analysis, decision to publish, or preparation of the manuscript.

**Competing Interests:** The authors have declared that no competing interests exist.

\* E-mail: daegling@ufl.edu

## Introduction

The adaptive significance of australopith facial form is a critical inference for understanding the hominin radiation, and the role that hard-object feeding (durophagy) has played in early hominin evolution has been contemplated for decades [1–9]. Recently, a finite-element stress analysis of the skull of *Australopithecus africanus* has been interpreted as indicating that the critical resources in the diet of this early hominin were large (10–50 mm diameter), hard objects that were habitually processed using the premolars and subsequently masticated by the molars [10]. While concerns over the application of the mathematical model have been reviewed elsewhere [11], this interpretation was accompanied by inferences of the functional consequences of premolar enlargement and facial morphology. Specifically, premolar enlargement in early hominins has been held to indicate greater use of these teeth in biting or chewing [10,12–13]. The emphasis on premolar biting was also hypothesized to require buttressing of the facial skeleton in *A. africanus*, with forward placement of the zygomatic root and presence of anterior pillars representing two important structural solutions. The attendant mechanical advantage that the forward placement of the zygomatic affords also limits gape. These

observations led to the conclusion that hard objects ingested by *A. africanus* were too large to be crushed between opposing molars, and that the premolars were engaged for initial crushing, with the molars masticating the fragmented seeds. In this model of oral processing the premolars are recruited to shatter the hard outer coats of seeds, and the molars subsequently process the softer seeds and nuts within. This functional partitioning of premolars and molars has been invoked to explain the “absence of a strong hard-object microwear signal in the molars of many australopiths” [10, p 2127], presumably because the potential hard-object microwear signal is restricted to the premolars. Even so, a new model of microwear feature formation stipulates that hard objects processed orally need to be sufficiently small (<5 mm diameter) in order to leave an occlusal enamel microwear signature at all [14]. Consequently, under this hypothesized feeding strategy [10] and microwear formation model [14], dental microwear is expected to differ between premolars and molars owing to their different roles in feeding, and microwear complexity (e.g., heavy pitting) is expected to be reduced or absent on the premolars, since large objects are hypothesized to be incapable of producing high levels of microwear complexity, especially in worn teeth.

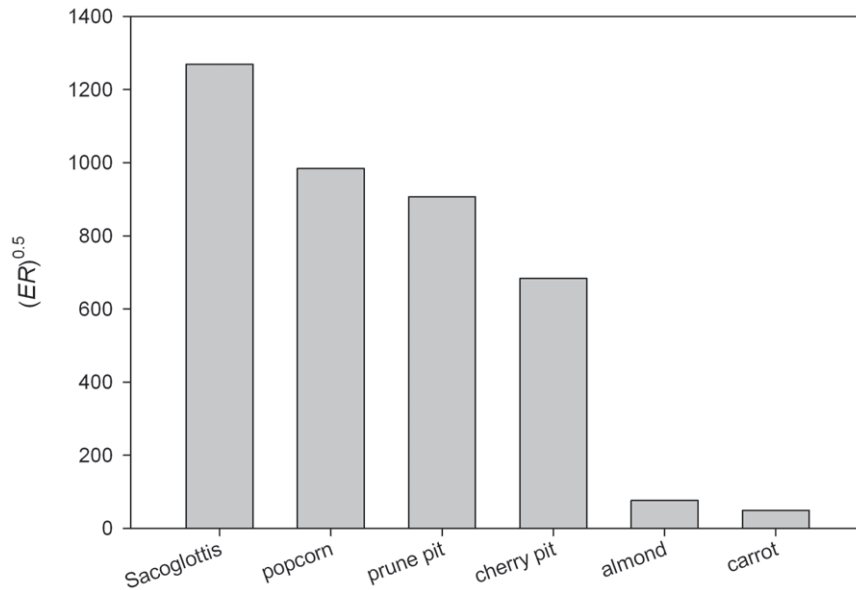

**Figure 1. Fragmentation index of *Sacoglottis gabonensis* compared to familiar food materials.**  $E$  is elastic modulus (MPa) and  $R$  is fracture toughness ( $\text{Jm}^{-2}$ ). High values indicate stress-limited foods, i.e., those expected to require high occlusal forces to induce structural failure. *Sacoglottis* is materially hard (high stiffness) but its “honeycombed” interior also renders it structurally tough. Comparative data are from ref 15. doi:10.1371/journal.pone.0023095.g001

Fortuitously, an extant cercopithecine monkey provides a suitable analog from which to test these predictions concerning the dietary adaptations of early hominins and augment our understanding of presumptively adaptive features related to durophagy in primates generally. The West African sooty mangabey, *Cercocebus atys*, is a terrestrial forager that habitually consumes the nuts of the fruit *Sacoglottis gabonensis* year-round, with seasonal fluctuations in which the nut comprises 25–80% of the monthly diet. The casing protecting the nut is highly stress-limited (fig. 1), as opposed to displacement-limited. Stress-limited foods fracture under high stress but low strain, whereas displacement-limited foods undergo relatively large deformations prior to crack formation [15]. Examples of stress-limited foods are items that are often described as “hard,” such as cherry pits and popcorn kernels, while displacement-limited foods, such as leaves, are described as “tough.”

*Sacoglottis* provides a reasonable proxy for presumptive critical items of the *A. africanus* diet because in addition to being very hard (=stress-limited), *Sacoglottis* casings are large (fig. 2), averaging 24 mm along their minor axis and 32 mm along their major axis ( $N=9$ ). Sooty mangabeys in the Taï Forest, Côte d’Ivoire process *Sacoglottis* in stereotypic fashion [16]: following manual harvesting from the leaf litter of the forest floor, the monkeys may scrape off any adherent material, and attempt to puncture the seed casing, all using the incisors. The casing is then placed behind the canines and one or more isometric bites are applied to shatter the object (fig. 3, Video S1). This is followed by expulsion of fragments and/or seeds from the oral cavity, a short bout of mastication, or placement in the cheek pouch for later processing.

We test predictions of large-object durophagy using *C. atys* as an analog for the inferred feeding behavior of *A. africanus* [10]. First, we examine whether enlargement of the premolars is consistently and exclusively associated with durophagy among anthropoid primates. Second, we argue that australopith facial morphology is sufficient but not necessary for large, hard-object feeding. Third,

our examination of dental microwear tests predictions that microwear complexity is diminished with respect to feeding on large, hard objects. Collectively, these data challenge the hypothesis that facial morphology in *A. africanus* – and perhaps other, more derived australopiths – necessarily represents a specific adaptation to large-object durophagy.

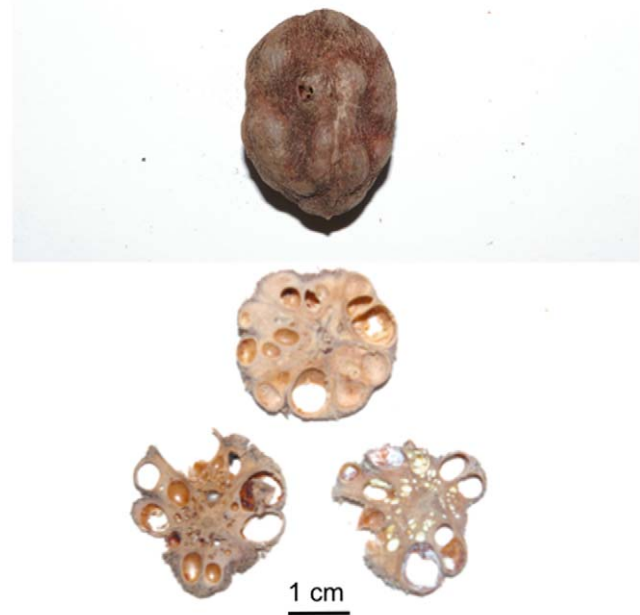

**Figure 2. Seed casing of *Sacoglottis gabonensis* (top), and cross sections (bottom).** Both the outer casing and the material comprising the inner compartments are hard, whereas the seeds found within the compartments (not pictured) are oily and relatively soft. doi:10.1371/journal.pone.0023095.g002

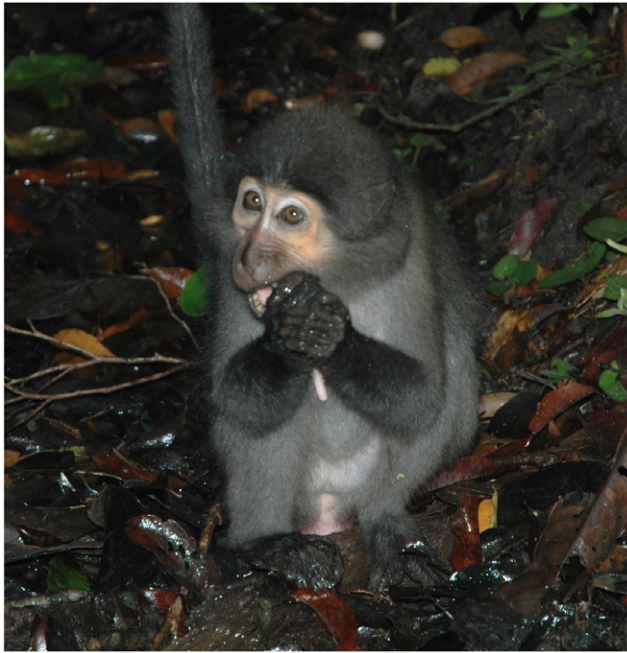

**Figure 3. Sooty mangabey female processing *Sacoglottis gabonensis* in the Tai Forest, Côte d'Ivoire.** Isometric biting with the postcanine teeth is an ingestive behavior associated almost exclusively (93.4% of all events) with *Sacoglottis*. doi:10.1371/journal.pone.0023095.g003

## Results

### Premolar enlargement and durophagy

Enlargement of the second premolar (P<sub>4</sub>) relative to the molars distinguishes *Cercocebus* mangabeys and their sister taxon *Mandrillus* from other papionins [17,18]. Comparative data [19] indicate that among living anthropoids, sooty mangabeys have large P<sub>4</sub>s relative to M<sub>1</sub>s (Tables 1, S1). Outside of the *Cercocebus*-*Mandrillus* group, the only taxa exceeding *Cercocebus atys* in the ratio of P<sub>4</sub>/M<sub>1</sub> area are *Saguinus geoffroyi*, *Macaca nigra*, and *Pongo pygmaeus*. Of these taxa, only *Pongo pygmaeus* is a confirmed hard-object feeder, although they consume such stress-limited foods infrequently and are known to consume a variety of displacement-limited foods [20–21]. The high value for *Saguinus* is plausibly an effect of phyletic dwarfing [22–24], whereby it is a relatively diminutive molar – rather than an expanded premolar – that accounts for the extreme value. Dietary hardness is unknown in *Macaca nigra*, which in any case appears to feed infrequently on unripe fruit and seeds [25]. In these cases, and in comparison to other known durophagous taxa (*Cebus apella* [26], *Macaca nemestrina* [27], *Mandrillus sphinx* [28], *Cercocebus galeritus* [29] and *Cercocebus torquatus* [30]), the P<sub>4</sub>-M<sub>1</sub> ratio in *Cercocebus atys* is not statistically significantly distinct. Its values are, however, significantly higher than *Lophocebus albigena*, another hard-object feeder [31]. While in general relatively large P<sub>4</sub>s are often found in hard-object feeders, not all durophagous primates have them, and there are taxa that have ratio values comparable to *Cercocebus atys* but do not engage in durophagy to any significant degree (e.g., *Hylobates lar*, *Gorilla gorilla*). Thus, premolar enlargement is associated with durophagy among living anthropoids, but not exclusively, and the relative degree of premolar expansion can vary greatly among hard-object feeders.

Enlarged, molarized premolars are frequently invoked as a functionally significant attribute of australopiths, particularly in

**Table 1. Mean Ratio of P<sub>4</sub>/M<sub>1</sub> area in *Cercocebus atys* and Higher Taxa.**

| Included Taxon          | Ratio (P <sub>4</sub> /M <sub>1</sub> ) |
|-------------------------|-----------------------------------------|
| <i>Cercocebus atys</i>  | 0.8087                                  |
| other <i>Cercocebus</i> | 0.8449                                  |
| subtribe Papionina      | 0.7775                                  |
| tribe Papionini         | 0.7717                                  |
| Cercopithecinae         | 0.7525                                  |
| Cercopithecidae         | 0.7245                                  |
| Catarrhini              | 0.7203                                  |
| Anthropoidea            | 0.7240                                  |
| Australopiths           | 0.7043                                  |

Data compiled from ref 19 except for *Cercocebus atys* which was derived from individuals collected under the Tai Monkey project (N = 8 females, 9 males); australopith data from refs 11,32. Other values represent the average of species means within higher taxa. Species ratio was calculated as the average of male and female means; these means were calculated as the mean P<sub>4</sub> area/mean M<sub>1</sub> area, with areas calculated as the product of mesiodistal and buccolingual dimensions. Mean ratio value for Anthropoidea includes australopith data. Mean values for individual taxa used in determination of included taxon values are provided in Table S1.

doi:10.1371/journal.pone.0023095.t001

*Paranthropus* [7,10–11,13,32]. Relative to first molar size, however, australopith P<sub>4</sub> size is unremarkable; in fact, the *Australopithecus* P<sub>4</sub>/M<sub>1</sub> ratio is significantly less than that observed in *Cercocebus atys* (Tables 1, S1). In addition, the two *Australopithecus* species measured have P<sub>4</sub>s that are below what is expected (relative to M<sub>1</sub> size) based on an anthropoid regression (i.e., their standardized residuals are negative, Table S1). This, of course, does not mean that early hominins did not possess large premolars; it merely underscores that the nature of premolar enlargement in modern primates (including hard-object feeders) is distinct from what is observed in australopiths. Premolar enlargement in early hominins was part of a general pattern of postcanine megadontia [9,33]. That the enlarged P<sub>4</sub>s in *Cercocebus atys* are associated with hard food processing may not explain the molarization of premolars in australopiths, since in the latter case the concomitant expansion of the molars may signify adaptation to a different feeding strategy, including the processing of small, abrasive food items [5].

### Facial buttressing

As a papionin primate, *Cercocebus atys* possesses a craniofacial morphology more similar to *Macaca fascicularis* than *A. africanus*. *Macaca fascicularis* was contrasted to *A. africanus* in finite - element modeling to illustrate the difference in strain fields under premolar biting [10]. That the two models yield different strain patterns need not be questioned; however, our observations of feeding in the field empirically establish that a facial morphology not dissimilar to macaques is capable of withstanding the stresses routinely associated with large, hard-object feeding. We therefore suggest that from the standpoint of mechanical integrity, australopith facial morphology is sufficient, but not necessary, for the occasional or habitual processing of hard objects in the diet.

Sooty mangabeys lack both anteriorly-placed zygomatic roots and anterior pillars. In terms of mechanical advantage, *Cercocebus* mangabeys display a facial morphology that serves to maintain gape at the expense of maximizing bite force relative to sister taxa that consume hard objects [34]. As in the case of facial buttressing, bite force efficiency (the effective conversion of muscle force into

bite force) is logically sufficient but not necessary for the habitual processing of large, hard objects.

Maximum bite force in *A. africanus* can be safely inferred, by virtue of body size differences alone, to have been much higher than in sooty mangabeys. Observation of mangabey feeding establishes their competence in habitual durophagy, and constitutes *prima facie* evidence that their dentition and jaws are competent for accommodating the attendant stress. Consequently, one need not suppose that maximization of bite force was a necessary adaptation among the australopiths for processing objects as stress-limited as *Sacoglottis*. *Cercocebus atys* manages to open these seed casings that under compressive stiffness testing yield at forces between 2000 and 3000 N. Since these figures exceed bite force capability in monkeys of this size [35,36], it is clear that there are ingestive behavioral strategies that allow processing of these items in the absence of impossibly high bite forces. We suspect that during incision activities the sooty mangabeys are initiating cracks which, once subjected to isometric biting, grow quickly. This idea is supported by observations ( $N = 4,828$ ) that sooty mangabeys discard 50.4% of *Sacoglottis* after initial incision; seed casings may be discarded because an effective broach was not achieved. It is also possible that at life stages when dental attrition has not progressed, the cusps of the postcanine teeth are used to produce point loads of the seed casing that can initiate cracks as well [37]. As attrition progresses, however, this strategy to initiate fracture becomes unavailable.

### Dental microwear complexity

Our examination of  $P^4$  and  $M^1$  occlusal enamel indicates no significant difference between premolar and molar microwear fabrics (Table 2, Table S2), high microwear complexity on the premolars (fig. 4), and microwear texture that does not covary with attrition on either  $M^1$  or  $P^4$  (fig.5, Table S3). The *Cercocebus atys* microwear profile is highly complex in accord with those for other living hard-object feeders (Table 3). These results are potentially ascribed to the mechanical properties of the food objects themselves, the presence of grit adherent to the harvested nuts, or interaction between these factors. While grit may be expected to be adherent to the mesocarp of fruits harvested on the forest floor, the ingestive behavior of the Taï mangabeys suggests that this may not be the primary agent creating microwear. Sooty mangabeys at Taï routinely bite or scrape the seed casing using the incisors prior to placement of nuts on the postcanine tooth row: of the 5,029 examined bouts of feeding on *Sacoglottis*, only 185 (3.7%) involve premolar crushing in the absence of incisal action. Even if terrestrial foraging is plausibly implicated as a source of ingested grit, exogenous grit has been shown to exist high in the canopy [38], and many forest foods contain endogenous phytoliths likely capable of creating microwear. Hard-object feeders that are arboreal foragers (e.g., *Lophocebus albigena*) show complex microwear fabrics, and feature size and shape may be of value in distinguishing fabrics caused by abrasion with phytoliths versus exogenous grit [39].

An assertion that microwear complexity differences among taxa are to some degree independent of food mechanical properties requires an assumption that among extant primates examined, hard-object feeders routinely encounter more grit on their ingested food than do those that do not eat hard foods. In any case, microwear likely reflects food fracture properties as such properties influence the approach of opposing occlusal surfaces to one another. Tougher, displacement-limited foods that are sheared involve more parallel approach, more striations and less complexity. Harder, stress-limited foods that are crushed and fail catastrophically involve more perpendicular approach, greater pitting and more complexity. Fracture characteristics of foods,

**Table 2.** Dental Microwear Attributes of  $P^4$  and  $M^1$  in *Cercocebus atys*.

| Variable         | tooth | mean   | st dev | skew   | kurtosis | P     |
|------------------|-------|--------|--------|--------|----------|-------|
| A <sub>fsc</sub> | $P^4$ | 4.435  | 2.323  | 0.868  | 0.096    |       |
|                  | $M^1$ | 4.076  | 1.726  | 0.135  | -0.124   | 0.925 |
| L <sub>sar</sub> | $P^4$ | 0.003  | 0.001  | 1.239  | 0.720    |       |
|                  | $M^1$ | 0.004  | 0.001  | 0.576  | -0.395   | 0.109 |
| T <sub>fv</sub>  | $P^4$ | 15873  | 1689.4 | -0.105 | 2.541    |       |
|                  | $M^1$ | 14834  | 2068.2 | 0.701  | 0.950    | 0.158 |
| S <sub>mc</sub>  | $P^4$ | 27.267 | 53.139 | 2.865  | 9.084    |       |
|                  | $M^1$ | 10.261 | 20.382 | 1.849  | 2.015    | 0.683 |

$N = 14$  for all samples. Two-tailed probabilities were evaluated via the Wilcoxon signed-ranks test. *A<sub>fsc</sub>* = area scale fractal complexity, describes "pittedness" of enamel surfaces; high values are observed in hard-object feeders among living primates. *L<sub>sar</sub>* = length scale anisotropy of relief, a measure of heterogeneity of the microwear fabric. *T<sub>fv</sub>* = textural fill volume, a measure of the three-dimensional volume of smaller surface features. *S<sub>mc</sub>* = scale of maximal complexity, an indicator of feature size, with smaller features contributing to higher index values.

doi:10.1371/journal.pone.0023095.t002

consequently, condition the force vectors by which ingested particles interact with dental enamel and create wear. From this perspective, the microwear fabrics of durophagous primates are distinct from those ingesting more displacement-limited foods (e.g., leaves) because of distinctive dynamics of tooth-particle-tooth interactions during biting and mastication.

### Discussion

Functional inference of feeding adaptations in fossil hominins is theoretically straightforward but operationally challenging in terms of hypothesis testing. Neontological analogs for early hominin morphology and behavior have served to generate hypotheses of hominin paleoecology [1,40–41] that could be subsequently tested by other, independent means [12,42–44]. In addition, biomechanical analyses of the masticatory system have been undertaken to infer functional performance and feeding behavior [3,8,10,45].

The logic of the use of modern analogs to draw paleontological inferences is transparent. Modern taxa whose morphological features converge on patterns observed in fossil taxa are assumed to engage in behaviors that, to some extent, characterized the extinct forms. In cases where the analog is distantly related to a fossil taxon, phylogenetic constraint must be assumed to be minimal if the validity of the analogy is to hold; moreover, any finding that the morphological complex in question is not associated with a particular function or behavior weakens the original analogy [46]; e.g., the hypothesis that thick molar enamel is an adaptation to durophagy is compromised by an observation of thin enamel in a hard-object feeder [47].

### The durophagous sooty mangabey as a living analog of early hominins

Accompanying the postcanine megadontia of early hominins is the presence of thick enamel on the molars [48–49]. These traits were also present in certain Miocene apes [9], and thick enamel in these forms has been postulated – by analogy to living primates – to be specifically linked to durophagy involving nut-cracking behavior [50]. Sooty mangabeys possess thick enamel on the premolars and molars that are used to crack *Sacoglottis* seed casings



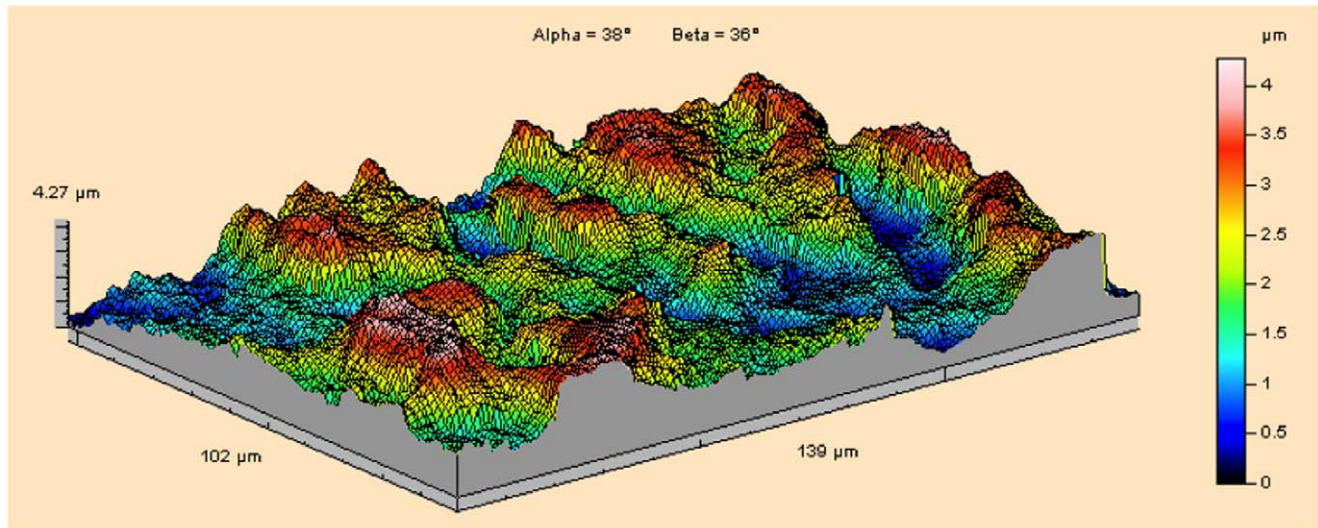

**Figure 4. Enamel surface of the P<sup>4</sup> of a *Cercocebus atys* specimen collected from Taï Forest, Côte d'Ivoire.** The topography of wear resembles that of other primate hard-object feeders (e.g., some *Cebus apella* and *Lophocebus albigena*). doi:10.1371/journal.pone.0023095.g004

(Table 4). Among living primates, relative enamel thickness is greater in hard-object feeders [50–52], although thick molar enamel is not prerequisite to durophagy [47].

There is no consensus on the significance of postcanine megadontia in early hominins with respect to durophagy. Megadontia is plausibly linked to diets that may have involved tough as well as hard foods [7,45]. Comparative data [19,53–54] suggest that sooty mangabeys display postcanine megadontia relative to body size (fig. 6), although they are not exceptional in this regard (Table S4). Taxa in which both males and females exceed *Cercocebus atys* in standardized residual values include only *Papio cynocephalus*, *Theropithecus gelada*, *Macaca fascicularis* and *Cercocebus galeritus*. Of these, *Cercocebus galeritus* is similar to *Cercocebus atys* in its durophagous habits [29], and though the diet of *Theropithecus* ostensibly involves hard objects [1], food toughness is perhaps as important a dietary challenge in this species [5]. Neither *Papio cynocephalus* nor *Macaca fascicularis* are known to be durophagous, yet both show greater expression of megadontia than *Cercocebus mangabeys*. The relationship of megadontia to diet is thus unclear and unpredictable.

Enlarged P4s, postcanine megadontia and thick molar enamel are plausibly linked to durophagy, although the processing of hard objects does not require this constellation of features. Collectively, these features can also be viewed as a means to limit attrition [55–56]. This explanation neither requires nor denies an important role for hard seeds and nuts as a source of attrition; ingested items across a spectrum of food types are known to produce wear [38].

#### Mechanical trade-off of gape, effective bite force, and food size

On mechanical principles, primates are faced with the dilemma that gape can be maximized only at the expense of effective conversion of muscular force into bite force [57]. Gape is argued to be an integral constraint in the feeding behavior of *A. africanus*, limiting the initial fracture of hard objects to the premolars [10], because the benefit of enhancing adductor leverage is worth the cost of reducing gape. Gape is currently unknowable in fossil taxa, since the elasticity of the adductor mass – a function of pennation (the packing and orientation of muscle fibers) – is not recoverable.

Gape at the premolars is estimated at 50 mm in *A. africanus* [10]. This figure places an upper limit on ingested food size, but also implies that means of extraoral food reduction were beyond the behavioral capacity of this species. Given living primate strategies for extraoral nut smashing [58–60], it is unreasonable to suppose that australopiths could not circumvent the problem of ingested food size. Both *Pan troglodytes* and *Cercocebus atys* endemic to Taï Forest, for example, occasionally process the hard nuts of *Coula edulis* in addition to those of *Sacoglottis*. The Taï chimpanzees, however, use hammerstones to process the nuts initially [58], while the mangabeys break the nuts entirely with their dentition. The chimpanzee strategy may be viewed as elective or obligate. It is unlikely that absolutely stronger chimpanzee jaws with their larger adductor mass could not process the nuts intraorally, even if chimpanzees have sensory mechanisms that discourages nut-cracking on thin-enamelled molars. The argument that *A. africanus* habitually and preferentially used their dentitions for initial reduction of large, hard objects [10] has important implications for their foraging behavior and behavioral ecology.

Even though hard-object feeding is associated with biomechanically robust mandibles [13,20,61], studies of adductor mechanical advantage do not invariably sort hard-object feeders from other species. Dietary toughness (emphasizing displacement-limited foods) is associated with improved mechanical advantage as much as is dietary hardness [26,62–63]. Since improving mechanical advantage of the adductors will compromise gape, food size and geometry will covary with ingestive strategy independent of food mechanical properties to some degree [64–65]. *Cercocebus* species have apparently sacrificed bite force for gape; *Lophocebus mangabeys*, despite being described as “fallback” or seasonal hard-object feeders [31], are biomechanically better equipped to produce large occlusal forces in terms of craniofacial geometry [34].

Evolution of australopith facial form involves anterior migration of the zygomatic root, reduction in midfacial prognathism, and mediolateral expansion of the face, achieving extreme expression in *Paranthropus boisei* [3,41]. One functional result of the first two features is greater mechanical efficiency of the jaw adductors; i.e., the more efficient conversion of muscular force into masticatory force. Among Cercopithecoidea, greater expression of these features is found among the Colobinae [13,62], while *Cercocebus*

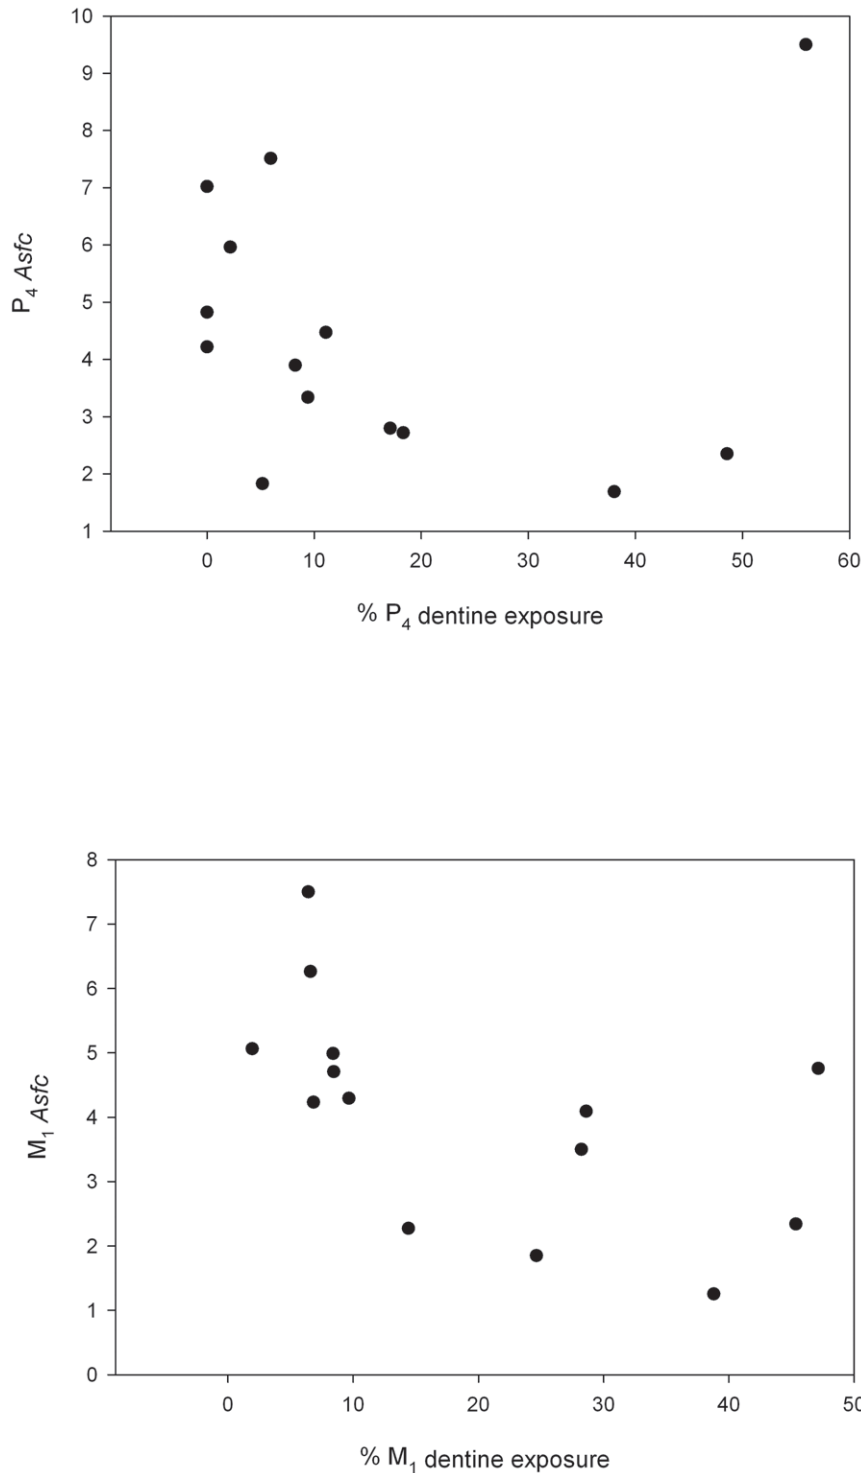

**Figure 5. Relationship of microwear complexity to state of wear on P<sub>4</sub> ( $P=0.253$  by Spearman's  $\rho$ ) and M<sub>1</sub> ( $P=0.0081$ ) in *Cercocebus atys*.** Under an experimentwise  $\alpha=0.00625$ , none of the microwear texture indices covaries significantly with magnitude of attrition. doi:10.1371/journal.pone.0023095.g005

mangabeys – being hard-object specialists – have craniofacial morphology that contrasts with the modern colobine condition. Since the colobine radiation is regarded as specializing on displacement-limited foods, the craniofacial skeleton of *Paranthropus* (and to a lesser extent, *Australopithecus*) is as plausible an adaptation to tough diets as to hard ones [7,41,45]. The strongest argument

against this interpretation is the occlusal morphology and thick enamel that characterize australopiths as a group [5,10].

#### Microwear and dietary inference

The effective diameters of *Sacoglottis* seed casings are such that during postcanine crushing, initial structural fracture is likely to

**Table 3.** Tests of Comparative Microwear Complexity (*A<sub>sfc</sub>*).

| <i>Cercocebus atys</i> versus   | difference | 95% confidence interval | <i>P</i> |
|---------------------------------|------------|-------------------------|----------|
| <i>Alouatta palliata</i>        | 90.63      | 120.04–54.22            | <0.001   |
| <i>Cebus apella</i>             | 16.74      | –18.06–51.54            | 0.844    |
| <i>Lophocebus albigena</i>      | 41.16      | 7.58–74.74              | 0.005    |
| <i>Pan troglodytes</i>          | 27.77      | –4.84–60.38             | 0.162    |
| <i>Pongo pygmaeus</i>           | 48.09      | 14.51–81.67             | <0.001   |
| <i>Trachypithecus cristata</i>  | 72.94      | 37.4–108.49             | <0.001   |
| <i>Gorilla gorilla beringei</i> | 41.61      | 8.54–74.68              | 0.004    |
| <i>Gorilla gorilla gorilla</i>  | 39.93      | 5.78–74.08              | 0.010    |

Probabilities based on Tukey's Honestly Significant Difference test for posthoc comparisons. ANOVA of *A<sub>sfc</sub>* among the nine taxa was significant at  $P < 0.001$ . Difference values are based on rank-transformed data.

doi:10.1371/journal.pone.0023095.t003

impact more than one isolated tooth in a given tooth row; this would also be true for *A. africanus* while feeding on objects as large as 50 mm across. The conjecture that premolar microwear would be distinct from that of the molars due to spatially limited food-tooth interactions makes intrinsic assumptions about the geometric regularity of ingested food that are unlikely to be met across all contexts. Analysis of premolar and molar microwear in *A. africanus* mirrors what is seen in *Cercocebus atys* in terms of overall similarity of microwear texture between teeth of the same individuals [11], with the difference that the higher complexity and reduced anisotropy in the microwear of *C. atys* is more clearly congruent with the microwear fabrics of other extant hard-object feeders.

The proximate causes of attrition and its microscopic detail are debated. Despite evidence that feeding on hard objects is associated with complex microwear fabrics [12,42,66], it is claimed that exogenous grit and only small, particularly hard food particles primarily account for microwear feature formation [10,14]. That is, large objects are expected to be essentially invisible in terms of microwear. Interpretation of microwear in *A. africanus* and *Paranthropus robustus* as indicative of omnivory versus durophagy, respectively [2,12], is thus challenged. Presumptive durophagy in *Paranthropus robustus* is reinterpreted as indicative of grit consumption analogous to terrestrially foraging baboons [67], while *Australopithecus africanus* is viewed as having the “expected” microwear signature of a seasonal hard-object feeder, albeit one that largely restricted its ingestion to large (>10 mm diameter) hard objects [10].

The anticipated finding of three microwear features has been offered as supporting a hypothesis of large, hard-object feeding in *A. africanus*: 1) different premolar and molar microwear patterns, owing to distinct use (initial fracture/crushing versus particle size reduction/fragmentation, respectively) during feeding, 2) absence of complexity features (i.e., “pits”) on premolar surfaces owing to their role in processing initially large nuts or seeds and 3) at late stages of attrition, diminished microwear complexity as the effects of large hard objects on occlusal enamel are reduced [10]. Using the sooty mangabey as a model for large, hard-object feeding, none of these features is observed in the context of large-object durophagy.

Interpretation of microwear fabrics is facilitated by recognizing that the amount of wear and the texture of the worn occlusal surface are not determined by identical agents. Abrasives are implicated in how much wear there is, but the texture attributes of the wear fabric depend on interactions of enamel occlusal surfaces and abrasives in or on food particles, on which local force vectors

will have large effects. These vectors will vary according to the mode of fracture (i.e., the mechanical properties) of ingested foods. Thus, microwear complexity of sooty mangabeys is a function of the failure characteristics of *Sacoglottis*, and is not entirely dependent on the amount of ingested grit. The absence of similar complexity in *A. africanus* cheek teeth [11] is inconsistent with an interpretation of durophagy in this hominin taxon.

### Durophagy as a hominin adaptation

Our review of sooty mangabey craniofacial morphology in comparative context suggests that thick enamel is strongly associated with durophagy, while this feeding strategy is less clearly associated with megadontia and premolar expansion in living anthropoids. Moreover, the sooty mangabey presents a strong counterargument to the idea that durophagy is necessarily associated with comparatively efficient facial configurations for the production of bite force and stress mitigation. Furthermore, mangabey microwear suggests that durophagy was not the primary or fallback feeding adaptation in *A. africanus*. In fact, microwear and stable isotope data in combination make a credible case for durophagy only in *Paranthropus robustus* [12,44]; for East African australopiths, hard-object feeding does not appear to be the primary component of the diet [42,68,69]. Assuming dental hypertrophy is adaptive for resisting attrition – whatever the source – the derived mandibular and facial morphology is consistent with a loading environment that is high frequency, but not necessarily high magnitude [70–73]. In this view, the australopith skull may represent a primary adaptation for a low-quality diet requiring intensive and prolonged processing of fibrous, but not necessarily hard, foods. This interpretation is consistent with recent paleoecological scenarios which suggest that sedges and their underground storage organs were critical items in early hominin diets [44,74,75]. Tough foods present as significant mechanical challenges as hard foods [26,76]. The objection to such an interpretation is that animals adapted to such diets display dental specializations (e.g., selenodont cheek teeth) that are completely unlike those of early hominins. Both material properties and geometry of foods are likely to be important determinants of dental form [64,77], and a tough diet is not necessarily one composed of primarily two-dimensional foods (e.g., leaves) in which enamel blades and crests represent the optimal morphology for food breakdown. Nevertheless, the australopith dentition would appear to be suboptimal for processing a diet primarily composed of displacement-limited foods.

Under the assumption that hominoid precursors were bunodont and thick-enamelled [50], the most efficient occlusal solutions for a pronounced dietary shift may have been evolutionarily inaccessible to early hominins [56]. This invocation of phylogenetic constraint may be equivalently applied to *Cercocebus atys*: bilophodont molar crests might not represent the optimal occlusal morphology for nut-cracking, nor is this species' facial morphology optimal for producing the large forces required to do so. These observations underscore the inherent weakness of analogy for paleontological inference; that is, unidentified phylogenetic constraints in both the modern analog and the fossil form conspire to foil the comparison. The present exercise, however, is not entirely futile because the effects of large, hard-object feeding on the dentition have been examined, and the microwear complexity associated with this behavior is absent in the teeth of australopiths with the exception of *Paranthropus robustus*. With respect to *Australopithecus africanus* [10], the specific inference of durophagy is based, in part, on a theoretical analysis which revealed the early hominin cranium was “better designed to withstand premolar loads” than a cercopithecine model [10]. Yet since field

**Table 4.** Postcanine Enamel Thickness.

| Source     | Species                     | Tooth          | N | Average Thickness | Relative Thickness 1 | Relative Thickness 2 |
|------------|-----------------------------|----------------|---|-------------------|----------------------|----------------------|
|            |                             |                |   | Mean (sd)         | Mean (sd)            | Mean (sd)            |
| This study | <i>Cercocebus atys</i>      | M <sub>3</sub> | 4 | 0.879 (0.112)     | 24.969 (1.977)       | 19.902 (3.030)       |
| This study | <i>Cercocebus atys</i>      | M <sub>2</sub> | 3 | 0.826 (0.049)     | 24.552 (1.325)       | 19.664 (2.416)       |
| This study | <i>Cercocebus atys</i>      | P <sub>4</sub> | 2 | 0.723 (0.077)     | 24.921 (1.642)       | 19.130 (1.628)       |
| Ref 47     | <i>Aotus trivirgatus</i>    | M <sub>1</sub> | 1 | 0.208             | 20.023               | 12.054               |
| Ref 47     | <i>Cacajao calvus</i>       | M <sub>2</sub> | 1 | 0.279             | 17.963               | 9.843                |
| Ref 47     | <i>Callicebus moloch</i>    | M <sub>2</sub> | 1 | 0.259             | 20.134               | 12.315               |
| Ref 47     | <i>Chiropotes satanas</i>   | M <sub>2</sub> | 2 | 0.223 (0.004)     | 18.559 (0.786)       | 10.353 (0.784)       |
| Ref 47     | <i>Pithecia monachus</i>    | M <sub>1</sub> | 1 | 0.276             | 19.779               | 11.81                |
| Ref 47     | <i>Cebus apella</i>         | M <sub>1</sub> | 2 | 0.500 (0.001)     | 24.909 (0.262)       | 18.845 (0.668)       |
| Ref 51     | <i>Cebus capucinus</i>      | M <sub>1</sub> | 3 | 0.75 (0.074)      | 22.537               | 15.13 (1.587)        |
| Ref 51     | <i>Lophocebus albigena</i>  | M <sub>1</sub> | 2 | 1.17 (0.013)      | 23.544               | 16.85 (0.530)        |
| Ref 51     | <i>Cercocebus torquatus</i> | M <sub>1</sub> | 3 | 1.24 (0.118)      | 19.855               | 12.89 (1.659)        |
| Ref 51     | <i>Cebus apella</i>         | M <sub>1</sub> | 1 | 0.990             | 26.83                | 21.36                |
| Ref 52     | <i>Cebus apella</i>         | M <sub>2</sub> | 1 | 0.486             | 25.309               | 19.211               |
| Ref 52     | <i>Alouatta villosa</i>     | M <sub>3</sub> | 1 | 0.378             | 17.479               | 9.746                |
| Ref 52     | <i>Callithrix jacchus</i>   | M <sub>2</sub> | 1 | 0.110             | 15.214               | 8.109                |
| Ref 52     | <i>Saimiri sciureus</i>     | M <sub>2</sub> | 1 | 0.159             | 16.846               | 9.659                |
| Ref 52     | <i>Cercopithecus mona</i>   | M <sub>2</sub> | 1 | 0.379             | 18.335               | 11.294               |
| Ref 52     | <i>Erythrocebus patas</i>   | M <sub>2</sub> | 2 | 0.479             | 19.358               | 12.298               |
| Ref 52     | <i>Macaca mulatta</i>       | M <sub>2</sub> | 3 | 0.546             | 19.995               | 13.149               |
| Ref 52     | <i>Macaca mulatta</i>       | M <sub>3</sub> | 1 | 0.461             | 21.237               | 13.995               |
| Ref 52     | <i>Macaca nemestrina</i>    | M <sub>2</sub> | 1 | 0.732             | 21.712               | 17.177               |
| Ref 52     | <i>Macaca nemestrina</i>    | M <sub>3</sub> | 1 | 0.649             | 18.87                | 12.193               |
| Ref 52     | <i>Papio cynocephalus</i>   | M <sub>2</sub> | 1 | 0.598             | 19.426               | 12.442               |
| Ref 52     | <i>Theropithecus gelada</i> | M <sub>2</sub> | 3 | 1.107             | 20.535               | 14.67                |
| Ref 52     | <i>Theropithecus gelada</i> | M <sub>3</sub> | 3 | 1.261             | 22.641               | 18.186               |
| Ref 52     | <i>Presbytis cristatus</i>  | M <sub>2</sub> | 1 | 0.428             | 18.487               | 11.443               |
| Ref 52     | <i>Gorilla gorilla</i>      | M <sub>2</sub> | 1 | 0.827             | 16.095               | 8.791                |
| Ref 52     | <i>Pongo pygmaeus</i>       | M <sub>3</sub> | 2 | 0.985             | 22.204               | 11.651               |
| Ref 52     | <i>Pan troglodytes</i>      | M <sub>2</sub> | 1 | 0.725             | 19.005               | 11.219               |
| Ref 52     | <i>Pan troglodytes</i>      | M <sub>3</sub> | 2 | 0.823             | 21.649               | 14.699               |
| Ref 52     | <i>Homo sapiens</i>         | M <sub>2</sub> | 9 | 1.236             | 25.659               | 20.756               |
| Ref 52     | <i>Homo sapiens</i>         | M <sub>3</sub> | 4 | 1.468             | 27.557               | 23.845               |

Units in mm. Means and where available standard deviations presented along with three measures:

Average Thickness = Area of enamel cap ÷ Length of enamel dentine junction.

Relative Thickness 1 = (√Area of enamel cap ÷ Length of enamel dentine junction) × 100.

Relative Thickness 2 = (Average Thickness ÷ √Area of the dentine) × 100.

doi:10.1371/journal.pone.0023095.t004

observations establish that mangabeys are fully capable of sustained large-object durophagy, it becomes clear that the superior facial design for this activity in early hominins was not a requisite one.

On the other hand, facial features such as forward placement of the zygomatic root [13], orthognathic midface [62], large mandibular corpora [78] and wide faces and interorbital region [79] that describe modern colobines resemble what is observed in derived australopiths [3]. Whether these resemblances indicate functional convergence for dealing with displacement-limited foods is unknown, and in any case the same pitfalls of using extant analogies apply here as well. Fortunately, established methods that reflect actual ingestive events in the paleontological

record – dental microwear and stable isotope analyses – provide glimpses into past behaviors unencumbered by the fog of evolutionary constraint. If we recognize the reality of such constraints, then findings of multiple and suboptimal morphological solutions to ecological problems may cease to surprise us.

## Materials and Methods

Diet and oral processing data on sooty mangabeys *Cercocebus atys* were collected from August 2008 to September 2009 in Tai forest, Côte d'Ivoire. The study group contains approximately 100 habituated individuals under continuous study since 1994. We used focal animal sampling to record all foods consumed by adults



Female catarrhines

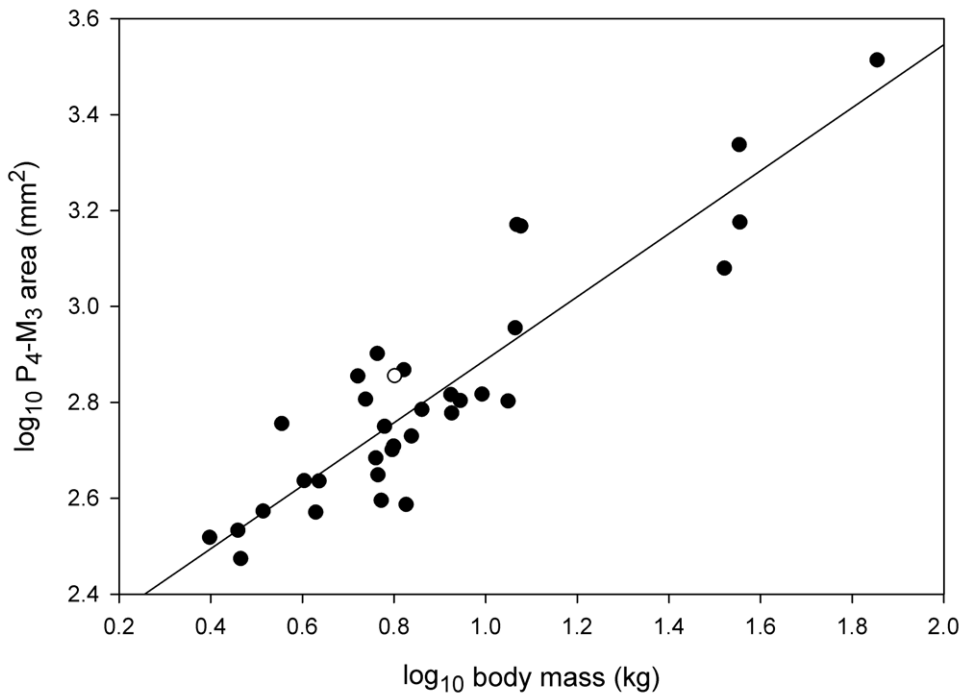

Male catarrhines

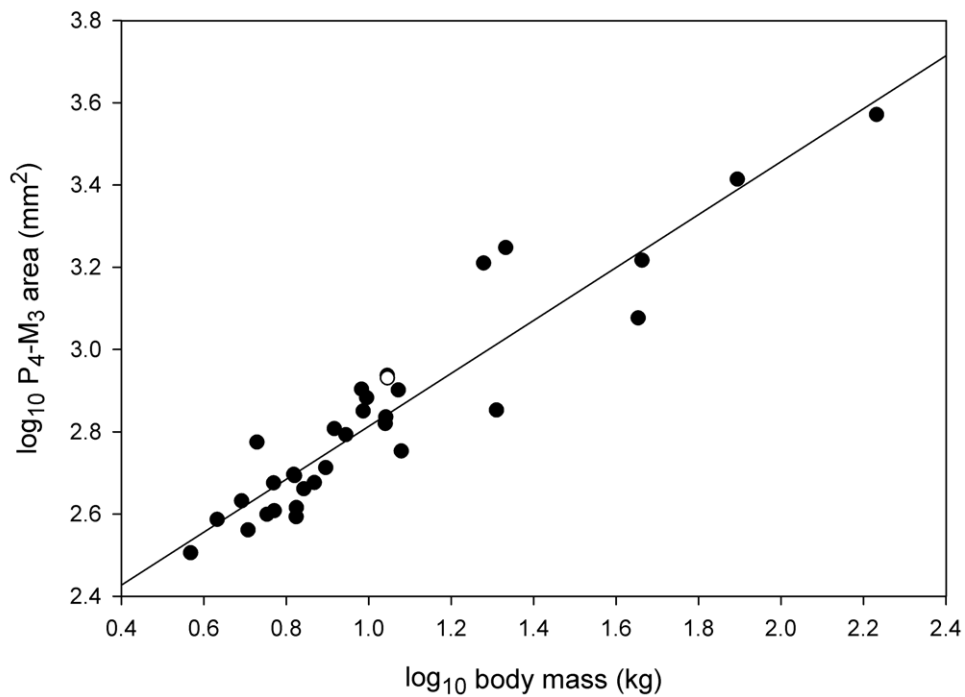

**Figure 6. Relative tooth size in catarrhine primates (N = 33).** *Cercocebus atys* is represented by open circles. Male and female sooty mangabeys have relatively but not exceptionally large postcanine teeth relative to body size. Tooth area data from ref 19; *C. atys* was measured from the Tai sample (N=8 females and N=9 males). Body weight data from refs 53,54. doi:10.1371/journal.pone.0023095.g006

vs. non-adults of both sexes. For each food item consumed, we described the associated oral processing activities using four behavioral categories: 1) incising, 2) canine puncture, 3) post canine crushes (i.e., isometric biting), and 4) mastication cycles. We calculated the frequency that each oral processing activity occurred during a given focal period and the frequency with which each activity was associated with individual food species. Full description of sampling methods is provided elsewhere [16].

Mechanical testing of *Sacoglottis* was conducted on an MTS 858 system (Eden Prairie, MN). Elastic modulus was determined in compression on machined specimens (N=5); toughness was determined from load-displacement curves from microtome guillotine application to prepared specimens (N=8). All experiments were conducted under displacement control at a rate of 0.167 mm/s [15].

Attributes of dental microwear texture [43,56,80] were determined from *Cercocebus atys* specimens with sufficient enamel on both P<sup>4</sup> and M<sup>1</sup> “Phase II” facets to permit analysis. These teeth were collected opportunistically from naturally deceased individuals (N=14) in Tai Forest, Côte d’Ivoire between 1994 and 2008. Original crowns were cleaned and molded with polyvinylsiloxane dental impression material, and casts were produced using a high resolution epoxy. Point clouds representing facet #9 surfaces were generated from replicas using a white-light scanning confocal profiler (Solaris Inc.) with a lateral sampling interval of 0.18 μm. Four adjacent fields of 138 μm×102 μm were sampled for a total area of 276 μm×204 μm.

Each point cloud was analyzed using ToothFrax and SFrax (Surfract Corp.) scale-sensitive fractal analysis software. Median values for each tooth of each specimen were computed for area-scale fractal complexity (*Asfc*), length-scale anisotropy of relief (*Lsar*), textural fill volume (*Tfv*), and scale of maximal complexity (*Smc*). These attributes are described in detail elsewhere [43]. Values for the premolars and molars of individuals were compared using Wilcoxon Signed-Ranks Tests [11,56].

*Cercocebus atys* enamel thickness measures were obtained following existing procedures [47–48,51–52]. Mandibular teeth (N=2 P<sub>4</sub>, 3 M<sub>2</sub>, 4 M<sub>3</sub>) were cleaned and fixed using cyanoacrylate (to prevent chipping) and coronally sectioned through mesial and distal cusp pairs with a diamond-wafering blade on a Buehler-Isomet low-speed saw. Exposed sections were gently scoured with 0.5% phosphoric acid to enhance enamel-dentine boundaries. Digital photographs were processed in ImageJ [81] to obtain measures of tooth crown area, dentine area (DA), enamel cap area (EA), and enamel-dentine junction length (EDJ). Three values of enamel thickness were calculated [1]: average enamel thickness (EA/EDJ) [2], relative thickness 1 ( $[EA^{0.5}/EDJ] \times 100$ ) [3], relative thickness 2 ( $[(\text{average enamel thickness}/DA^{0.3}) \times 100]$ ).

Statistical evaluation of differences in P<sub>4</sub>/M<sub>1</sub> area ratios utilized a bootstrap procedure. Dental metrics were resampled from the *Cercocebus atys* sample (with replacement) over 10,000 iterations to create a 95% confidence interval of the area ratio for comparison to other taxa, specific to the sample sizes used to calculate the area ratio for each species. In addition, we resampled the *Cercocebus atys* sample (with replacement) to create bootstrap means for comparison to mean values for other taxa. Bootstrap means were created using sample sizes specific to the taxon under comparison. Probability was determined as the number of bootstrap means in which the observed species mean value was matched or exceeded over 10,000 iterations. If, for example, the mean ratio for a taxon was less than that for the empirical mean for *Cercocebus atys*, probability was determined by counting the number of bootstrap iterations in which the resampled mean was as low or lower than that of the taxon under comparison.

## Supporting Information

**Table S1** Data compiled from refs 18,19 (extant anthropoids) and refs 11,32 (australopiths), except for *Cercocebus atys* which was derived from individuals collected under the Tai Monkey project (N=10 females, 8 males). We also collected data for the *Cercocebus chrysogaster* sample (N=2 females, 7 males). Ratios were calculated as the average of male and female means; these means were calculated as the mean P<sub>4</sub> area/mean M<sub>1</sub> area, with areas calculated as the product of mesiodistal and buccolingual dimensions. Residuals calculated from regression of log P<sub>4</sub> area (Y) on log M<sub>1</sub> area (X) from Model I (least squares) regression. The 95% confidence interval provided is based on a bootstrap estimate over 10,000 iterations in which the *Cercocebus atys* data are resampled (with replacement) at sample sizes reported for the taxon under comparison. Probabilities are calculated based on a bootstrap test for mean differences between *Cercocebus atys* and each taxon. This involves resampling the *Cercocebus atys* data over 10,000 iterations at sample sizes reported for the compared taxon. If the empirical mean for *Cercocebus atys* is greater than that of the compared taxon, what is tested is whether the resampled means are as small as or smaller than that of the compared taxon (and vice-versa if the sooty mangabey mean is less than that of the taxon being compared). Because there are 51 comparisons in all, we employ the Bonferroni correction to set  $\alpha = 0.00098$ . A P value of zero indicates that in no case did the bootstrap means match or exceed the mean for the compared taxon.

(DOC)

**Table S2** *Asfc* = area scale fractal complexity; *Lsar* = length scale anisotropy of relief; *Tfv* = textural fill volume; *Smc* = scale of maximal complexity.

(DOC)

**Table S3** Under an experiment-wise significance threshold = 0.05/n comparisons,  $\alpha = 0.00625$ . By this criterion, none of the microwear texture variables are correlated with attrition. Attrition was measured as the proportion of dentine exposed on occlusal surfaces relative to total crown area. Owing to distributional properties of microwear texture variables, Spearman’s rank-order correlation was used for statistical evaluation.

(DOC)

**Table S4** Tooth area data compiled from ref 19 except for *Cercocebus atys* which was derived from individuals collected under the Tai Monkey project (N=8 females, 8 males). Body mass data from refs 53,54. Residuals calculated from regression of log P<sub>4</sub>-M<sub>3</sub> area (Y) on log body mass (X) from Model I (least squares) regression.

(DOC)

**Video S1** An adult female sooty mangabey (*Cercocebus atys*) consuming a *Sacoglottis gabonensis* seed recovered from a swampy area in the Ivory Coast’s Tai Forest. These seeds are the hardest items in the sooty mangabey diet and are also the most frequently consumed food item of all group members (with the exception of dependent young). Oral processing activities include incision and powerful, isometric bites both of which are readily apparent in this video.

(MPEG)

## Acknowledgments

Richard Paacho provided invaluable assistance in collection of behavioral data. Logistical support in Côte d’Ivoire was provided by Prof. B. Bonfoh of CSRS; permission to conduct research in Tai Forest was provided by Ministère de l’Enseignement Supérieur et de la Recherche Scientifique,

Direction Generale de la Recherche Scientifique et de l'Innovation Technologie, and the Ministere de l'Environnement, des Eaux et Forets, Office Ivoirien de Parcs et Reserves.

## References

- Jolly CJ (1970) The seed-eaters: a new model of hominid differentiation based on a baboon analogy. *Man* 5: 5–26.
- Grine FE (1981) Trophic differences between 'gracile' and 'robust' australopithecines: A scanning electron microscope analysis of occlusal events. *S Afr J Sci* 77: 203–230.
- Rak Y (1983) *The Australopithecine Face*. New York: Academic.
- Kay RF (1985) Dental evidence for the diet of *Australopithecus*. *Ann Rev Anthropol* 14: 315–341.
- Lucas PW, Corlett RT, Luke DA (1985) Plio-Pleistocene hominid diets: an approach combining masticatory and ecological analysis. *J Hum Evol* 14: 187–202.
- Peters CR (1987) Nut-like oil seeds: Food for monkeys, chimpanzees, humans, and probably ape-men. *Am J Phys Anthropol* 73: 333–363.
- Hyalander WL (1988) Implications of in vivo experiments for interpreting the functional significance of "robust" australopithecine jaws. In Grine FE, ed. *Evolutionary History of the "Robust" Australopithecines*. New York: Aldine de Gruyter. pp 55–83.
- Daegling DJ, Grine FE (1991) Compact bone distribution and biomechanics of early hominid mandibles. *Am J Phys Anthropol* 86: 321–339.
- Teaford MF, Ungar PS (2000) Diet and the evolution of the earliest human ancestors. *Proc Nat Acad Sci USA* 97: 13506–13511.
- Strait DS, Weber GW, Neubauer S, Chalk J, Richmond BG, et al. (2009) The feeding biomechanics and dietary ecology of *Australopithecus africanus*. *Proc Nat Acad Sci USA* 106: 2124–2129.
- Grine FE, Judex S, Daegling DJ, Ozcivici E, Ungar PS, et al. (2010) Craniofacial biomechanics and functional and dietary inferences in hominin paleontology. *J Hum Evol* 58: 293–308.
- Grine FE (1986) Dental evidence for dietary differences in *Australopithecus* and *Paranthropus*: a quantitative analysis of permanent molar microwear. *J Hum Evol* 15: 783–822.
- Hyalander WL (1979) The functional significance of primate mandibular form. *J Morphol* 160: 223–239.
- Lucas PW, Constantino P, Wood B, Lawn B (2008) Dental enamel as a dietary indicator in mammals. *BioEssays* 30: 374–385.
- Williams SH, Wright BW, Truong VD, Daubert CR, Vinyard CJ (2005) Mechanical properties of foods used in experimental studies of primate masticatory function. *Am J Phys Anthropol* 67: 329–346.
- McGraw WS, Vick AE, Daegling DJ (2011) Sex and age differences in the diet and ingestive behaviors of sooty mangabey in the Tai Forest, Ivory Coast. *Am J Phys Anthropol* 144: 140–153.
- Fleagle JG, McGraw WS (1999) Skeletal and dental morphology supports diphyletic origins of baboons and mandrills. *Proc Nat Acad Sci USA* 96: 1157–1161.
- Gilbert C (2007) Craniomandibular morphology supporting the diphyletic origin of mangabey and a new genus of the *Cercocebus/Mandrillus* clade, *Procercocebus*. *J Human Evol* 53: 69–102.
- Swindler DS (2002) *Primate Dentition*. Cambridge: Cambridge University Press.
- Taylor AB (2006) Feeding behavior, diet, and the functional consequences of jaw form in orangutans, with implications for the evolution of *Pongo*. *J Hum Evol* 50: 377–393.
- Vogel ER, van Woerden JT, Lucas PW, Utami Atmoko SS, van Schaik CP, et al. (2008) Functional ecology and evolution of hominoid molar enamel thickness: *Pan troglodytes schweinfurthii* and *Pongo pygmaeus wurmbii*. *J Hum Evol* 55: 60–74.
- Ford SM (1980) Callitrichids as phyletic dwarfs, and the place of the callitrichidae in platyrrhini. *Primates* 21: 31–43.
- Rosenberger AL (1984) Aspects of the systematics and evolution of the marmosets. In Mello MT, ed. *A primatologia no Brasil*. Brasilia: Sociedade Brasileira de Primatologia. pp 159–180.
- Sussman RW, Kinzey WG (1984) The ecological role of the Callitrichidae. *Am J Phys Anthropol* 64: 419–449.
- O'Brien TG, Kinnaird MF (1977) Behavior, diet and movements of the Sulawesi Crested Black Macaque (*Macaca nigra*). *Int J Primatol* 18: 321–351.
- Wright BW (2005) Craniodental biomechanics and dietary toughness in the genus *Cebus*. *J Hum Evol* 48: 473–492.
- Caldecott JO, Feistner ATC, Gadsby EL (1996) A comparison of ecological strategies of pig-tailed macaques, mandrills, and drills. In Fa JE, Lindburg DG, eds. *Evolution and Ecology of Macaque Societies*. Cambridge: Cambridge University Press. pp 73–94.
- Hoshino J (1985) Feeding ecology of mandrills (*Mandrillus sphinx*) in Campo Animal Reserve, Cameroon. *Primates* 26: 248–273.
- Wieczkowski J (2009) Brief communication: Puncture and crushing resistance scores of Tana river mangabey (*Cercocebus galeritus*) diet items. *Am J Phys Anthropol* 140: 572–577.
- Cooke C, McGraw S (2010) Diet, food hardness and tooth use in red-capped mangabey from Sette Cama, Gabon. *Am J Primatol* 72S: 38.
- Lambert JE, Chapman CA, Wrangham RW, Conklin-Brittain NL (2004) The hardness of cercopithecine foods: implications for the critical function of enamel thickness in exploiting fallback foods. *Am J Phys Anthropol* 125: 363–368.
- White TD, Johanson DC, Kimbel WH (1981) *Australopithecus africanus*: its phyletic position reconsidered. *S Afr J Sci* 77: 445–470.
- McHenry HM (1984) Relative cheek tooth size in *Australopithecus*. *Am J Phys Anthropol* 64: 297–306.
- Singleton M (2004) Geometric morphometric analysis of functional divergence in mangabey facial form. *J Anthropol Sci* 82: 27–44.
- Lucas PW, Peters CR (1994) Seed-breaking forces exerted by orang-utans with their teeth in captivity and a new technique for estimating forces produced in the wild. *Am J Phys Anthropol* 94: 365–378.
- Dechow PC, Carlson DS (1990) Occlusal force and craniofacial biomechanics during growth in rhesus monkeys. *Am J Phys Anthropol* 83: 219–237.
- Happel R (1988) Seed-eating by West African cercopithecines, with reference to the possible evolution of bilophodont molars. *Am J Phys Anthropol* 75: 303–327.
- Ungar PS, Teaford MF, Glander KE (1995) Dust accumulation in the canopy: a potential cause for dental microwear in primates. *Am J Phys Anthropol* 97: 93–99.
- Ungar PS (1994) Incisor microwear of Sumatran anthropoid primates. *Am J Phys Anthropol* 94: 339–363.
- Szalay FS (1976) Hunting-scavenging protohominids: a model for hominid origins. *Man* 10: 420–429.
- DuBrul EL (1977) Early hominid feeding mechanisms. *Am J Phys Anthropol* 47: 305–320.
- Ungar PS, Grine FE, Teaford MF (2008) Dental microwear and diet of the Plio-Pleistocene hominin *Paranthropus boisei*. *PLoS One* 3: e2044.
- Scott RS, Ungar PS, Bergstrom TS, Brown CA, Grine FE, et al. (2005) Dental microwear texture analysis shows within-species diet variability in fossil hominins. *Nature* 436: 693–695.
- Sponheimer M, Passey BH, de Ruiter DJ, Guatelli-Steinberg D, Cerling TH, et al. (2006) Isotopic evidence for dietary variability in the early hominin *Paranthropus robustus*. *Science* 314: 980–981.
- Demes B, Creel N (1988) Bite force, diet and cranial morphology of fossil hominids. *J Hum Evol* 17: 657–670.
- Kay RF, Cartmill M (1977) Cranial morphology and adaptations of *Palaeothloron nacimienti* and other paromomyidae (Plesiadapoidea, ? primates), with a description of a new genus and species. *J Hum Evol* 6: 19–53.
- Martin LB, Olejniczak AJ, Maas MC (2003) Enamel thickness and microstructure in pitheciine primates, with comments on dietary adaptations of the middle Miocene hominoid *Kenyanthropus*. *J Hum Evol* 45: 351–367.
- Grine FE, Martin LB (1988) Enamel thickness and development in *Australopithecus* and *Paranthropus*. In Grine FE, ed. *Evolutionary History of the "Robust" Australopithecines*. New York: Aldine de Gruyter. pp 3–42.
- Olejniczak AJ, Smith TM, Skinner MM, Grine FE, Feeney RNM, et al. (2008) Three-dimensional molar enamel distribution and thickness in *Australopithecus* and *Paranthropus*. *Biol Lett* 4: 406–410.
- Kay RF (1981) The nut-crackers – a new theory of the adaptations of the Ramapithecinae. *Am J Phys Anthropol* 55: 141–151.
- Dumont ER (1995) Enamel thickness and dietary adaptation among extant primates and chiropterans. *J Mammal* 76: 1127–1136.
- Shellis RP, Beynon AD, Reid DJ, Hiiemac KM (1998) Variations in enamel thickness among primates. *J Hum Evol* 35: 507–522.
- Delson E, Terranova CJ, Jungers WL, Sargis EJ, Jablonski NG, et al. (2000) Body Mass in Cercopithecidae (Primates, Mammalia): Estimation and Scaling in extinct and Extant Taxa. *Anthrop Papers Am Mus Nat Hist* 83: 1–159.
- Smith RJ, Jungers WL (1997) Body mass in comparative primatology. *J Hum Evol* 32: 523–559.
- Molnar S, Gantt DG (1977) Functional Implications of primate enamel thickness. *Am J Phys Anthropol* 46: 447–454.
- Ungar PS, Scott RS, Grine FE, Teaford MF (2010) Molar microwear textures and the diets of *Australopithecus anamensis* and *Au. afarensis*. *Philos Trans R Soc Lond B Biol Sci* 365: 3345–3354.
- Hyalander WL, Vinyard CJ (2006) The evolutionary significance of canine reduction in hominins: functional links between jaw mechanics and canine size. *Am J Phys Anthropol* S42: 107.
- Boesch C, Boesch H (1982) Optimisation of nut-cracking with natural hammers by wild chimpanzees. *Behaviour* 83: 265–286.
- Struhsaker T, Leland L (1977) Palm nut smashing by *Cebus apella* in Colombia. *Biotropica* 9: 124–126.
- Fragaszy D, Izar P, Visalberghi E, Ottoni EB, Gomes de Oliveira M (2004) Wild capuchin monkeys (*Cebus libidinosus*) use anvils and stone pounding tools. *Am J Primatol* 64: 359–366.

## Author Contributions

Conceived and designed the experiments: DD WSM PSU JDP AEV EAB. Performed the experiments: DD WSM PSU JDP AEV. Analyzed the data: DD WSM PSU JDP AEV. Wrote the paper: DD WSM PSU.

61. Daegling DJ (1992) Mandibular morphology and diet in the genus *Cebus*. *Int J Primatol* 13: 545–570.
62. Ravosa MJ (1990) Functional assessment of subfamily variation in maxillomandibular morphology among Old World monkeys. *Am J Phys Anthropol* 82: 199–212.
63. Spencer MA (1999) Constraints on masticatory system evolution in anthropoid primates. *Am J Phys Anthropol* 108: 483–506.
64. Yamashita N (2003) Food procurement and tooth use in two sympatric lemur species. *Am J Phys Anthropol* 121: 125–133.
65. Prinz JF, Lucas PW (2001) “The first bite of cherry”: intra-oral manipulation prior to the first bite in humans. *J Oral Rehab* 28: 614–617.
66. Teaford MF, Walker AC (1985) Quantitative differences in dental microwear between primate species with different diets and a comment on the presumed diet of *Sivapithecus*. *Am J Phys Anthropol* 64: 191–200.
67. Daegling DJ, Grine FE (1999) Terrestrial foraging and dental microwear in *Papio ursinus*. *Primates* 40: 559–572.
68. Grine FE, Ungar PS, Teaford MF, El-Zaatari S (2006) Molar microwear in *Praeanthropus afarensis*: evidence for dietary stasis through time and under diverse paleoecological conditions. *J Hum Evol* 51: 297–319.
69. Cerling TE, Mbua E, M’Kirera F, Manthi FK, Grine FE, et al. (2011) Diet of *Paranthropus boisei* in the early Pleistocene of East Africa. *Proc Nat Acad Sci USA*;doi:10.1073/pnas.1104627108.
70. Rubin CT, McLeod KJ, Bain SD (1990) Functional strains and cortical bone adaptation: epigenetic assurance of skeletal integrity. *J Biomech* 23: 43–54.
71. Rubin CT, McLeod KJ, Gross TS, Donahue HJ (1991) Physical stimuli as potent determinants of bone morphology. In Carlson DS, Goldstein SA, eds. *Bone Biodynamics in Orthodontic and Orthopedic Treatment*. Craniofacial Growth Series Volume 27. Ann Arbor: Center for Human Growth and Development, University of Michigan. pp 75–91.
72. Judex S, Lei X, Han D, Rubin C (2006) Low-magnitude mechanical signals that stimulate bone formation in the varietomized are dependent on the applied frequency but not on the strain magnitude. *J Biomech* 40: 1333–1339.
73. Ozcivici E, et al. (2009) Mechanical Signals as Anabolic Agents in Bone. *Nature Rev Rheumatol* 6: 50–59.
74. Laden G, Wrangham R (2005) The rise of the hominids as an adaptive shift in fallback foods: plant underground storage organs (USOs) and australopith origins. *J Human Evol* 49: 482–498.
75. Wrangham R, Cheney D, Seyfarth R, Sarmiento E (2009) Shallow-water habitats as sources of fallback foods for hominins. *Am J Phys Anthropol* 140: 630–642.
76. Norconk MA, Wright BW, Conklin-Brittain NL, Vinyard CJ (2009) Mechanical and nutritional properties of food as factors in platyrrhine dietary adaptations. In Garber PA, Estrada A, Bicca-Marques JC, Heymann EW, Strier KB, eds. *South American Primates: Perspectives in the Study of Behavior, Ecology and Conservation*. New York: Springer. pp 279–319.
77. Yamashita N (1996) Seasonality and site specificity of mechanical dietary patterns in two malagasy lemur families (Lemuridae and Indridae). *Int J Primatol* 17: 355–387.
78. Ravosa MJ (1996) Jaw morphology and function in living and fossil Old World monkeys. *Int J Primatol* 17: 909–932.
79. Szalay FS, Delson E (1979) *Evolutionary History of the Primates*. New York: Academic.
80. Scott RS, et al. (2006) Dental microwear texture analysis: technical considerations. *J Hum Evol* 51: 339–349.
81. Abramoff MD, Magelhaes PJ, Ram SJ (2004) Image Processing with Image J. *Biophotonics International* 11: 36–42.
